# Supplementary material for: A Missense Variant in SCN8A in Alpine Dachsbracke Dogs Affected by Spinocerebellar Ataxia
Source: MDPI journal article supplement (doi:10.3390/genes10050362), 2019-05-10
Supplement: s1 [file s1]

**Table S7: Alignment of SCN8A in vertebrate species.** The glycine residue that is substituted by a valine (p.Gly1633Val) in affected Alpine Dachsbracke dogs is highly conserved in the SCN8A orthologs (shown in yellow) similar to the 'jolting' mutant in mice (p.Ala1317Thr; Kohrmann et al. 1996) (shown in green).

| Protein Acc.                   | Gene         | Organism                                              | Identity to <i>H. sapiens</i> (%) |      |
|--------------------------------|--------------|-------------------------------------------------------|-----------------------------------|------|
|                                |              |                                                       | Protein                           | DNA  |
| <a href="#">NP_055006.1</a>    | SCN8A        | <i>H.sapiens</i>                                      | 100                               | 100  |
| <a href="#">XP_001141985.3</a> | SCN8A        | <i>P.troglodytes</i>                                  | 99.5                              | 99.2 |
| <a href="#">XP_001090295.1</a> | SCN8A        | <i>M.mulatta</i>                                      | 99.9                              | 98.8 |
| <a href="#">XP_850134.1</a>    | SCN8A        | <i>C.lupus</i>                                        | 99.4                              | 95.4 |
| <a href="#">NP_001180031.1</a> | SCN8A        | <i>B.taurus</i>                                       | 99.5                              | 94.4 |
| <a href="#">NP_001070967.1</a> | Scn8a        | <i>M.musculus</i>                                     | 98.7                              | 90.1 |
| <a href="#">NP_062139.2</a>    | Scn8a        | <i>R.norvegicus</i>                                   | 98.7                              | 90.7 |
| <a href="#">XP_003643160.1</a> | SCN8A        | <i>G.gallus</i>                                       | 94.2                              | 83.9 |
| <a href="#">NP_001038648.1</a> | scn8ab       | <i>D.rerio</i>                                        | 83.6                              | 76.3 |
| <a href="#">NP_571703.1</a>    | scn8aa       | <i>D.rerio</i>                                        | 84.3                              | 76.0 |
| <a href="#">XP_004911965.1</a> | LOC101731347 | <i>X.tropicalis</i>                                   | 88.1                              | 77.1 |
| <br>                           |              |                                                       |                                   |      |
| <a href="#">NP_055006.1</a>    | 1            | MAARLLAPPGPDSFKPFTPELANIERRIAESKLKKP--PKADGSHREDD     | 48                                |      |
| <a href="#">XP_001141985.3</a> | 1            | MAARLLAPPGPDSFKPFTPELANIERRIAESKLKKP--PKADGSHREDD     | 48                                |      |
| <a href="#">XP_001090295.1</a> | 1            | MAARLLAPPGPDSFKPFTPELANIERRIAESKLKKP--PKADGSHREDD     | 48                                |      |
| <a href="#">XP_850134.1</a>    | 1            | MAARLLAPPGPDSFKPFTPELANIERRIAESKLKKP--PKAEGSHREDD     | 48                                |      |
| <a href="#">NP_001180031.1</a> | 1            | MAARLLAPPGPDSFKPFTPELANIERRIAESKLKKP--PKADGSHREDD     | 48                                |      |
| <a href="#">NP_001070967.1</a> | 1            | MAARLLAPPGPDSFKPFTPELANIERRIAESKLKKP--PKADGSHREDD     | 48                                |      |
| <a href="#">NP_062139.2</a>    | 1            | MAARLLAPPGPDSFKPFTPELANIERRIAESKLKKP--PKADGSHREDD     | 48                                |      |
| <a href="#">XP_003643160.1</a> | 1            | MAARLLAPPGPDSFKPFTPELANIEKRIAEEKKKKR--PKQDSSHRDDD     | 48                                |      |
| <a href="#">NP_001038648.1</a> | 1            | MAAPLLAPPGPDSFKRFTLESLANIEKRIAEEKKKKPVKPRSDSSHRDDD    | 50                                |      |
| <a href="#">NP_571703.1</a>    | 1            | MAAPLLAPPGPNSYKYFTRESLREIEKRIEEKAKPP--PKPDNSYRDDD     | 48                                |      |
| <a href="#">XP_004911965.1</a> |              | -----                                                 |                                   |      |
| <br>                           |              |                                                       |                                   |      |
| <a href="#">NP_055006.1</a>    | 49           | EDSKPKPNSDLEAGKSLPFIYGDIPQGLVAVPLEDFDPYYLTQKTFVVLN    | 98                                |      |
| <a href="#">XP_001141985.3</a> | 49           | EDSKPKPNSDLEAGKSLPFIYGDIPQGLVAVPLEDFDPYYLTQKTFVVLN    | 98                                |      |
| <a href="#">XP_001090295.1</a> | 49           | EDSKPKPNSDLEAGKSLPFIYGDIPQGLVAVPLEDFDPYYLTQKTFVVLN    | 98                                |      |
| <a href="#">XP_850134.1</a>    | 49           | EDSKPKPNSDLEAGKSLPFIYGDIPQGLVAVPLEDFDPYYLTQKTFVVLN    | 98                                |      |
| <a href="#">NP_001180031.1</a> | 49           | EDSKPKPNSDLEAGKSLPFIYGDIPQGLVAVPLEDFDPYYLTQKTFVVLN    | 98                                |      |
| <a href="#">NP_001070967.1</a> | 49           | EDSKPKPNSDLEAGKSLPFIYGDIPQGLVAVPLEDFDPYYLTQKTFVVLN    | 98                                |      |
| <a href="#">NP_062139.2</a>    | 49           | EDSKPKPNSDLEAGKSLPFIYGDIPQGLVAVPLEDFDPYYLTQKTFVVLN    | 98                                |      |
| <a href="#">XP_003643160.1</a> | 49           | EDSKPKPNSDLEAGKSLPFIYGDIPQGLVAVPLEDFDPYYMTQKTFVVLN    | 98                                |      |
| <a href="#">NP_001038648.1</a> | 51           | DDNKPKNPDLEAGKGVFPIYGDVPSNMLAVPLEDLDPFYLNKKTFIVLN     | 100                               |      |
| <a href="#">NP_571703.1</a>    | 49           | DENKPKPNGDLEAGKSLPFIYGDIPPGMVATPLEDFDPFYINQKTFVVLN    | 98                                |      |
| <a href="#">XP_004911965.1</a> |              | -----                                                 |                                   |      |
| <br>                           |              |                                                       |                                   |      |
| <a href="#">NP_055006.1</a>    | 99           | RGKTLFRFSATPALYILSPFNLIIRRIAIAKILIHVSFMSIIMCTILTNCVF  | 148                               |      |
| <a href="#">XP_001141985.3</a> | 99           | RGKTLFRFSATPALYILSPFNLIIRRIAIAKILIHVSFMSIIMCTILTNCVF  | 148                               |      |
| <a href="#">XP_001090295.1</a> | 99           | RGKTLFRFSATPALYILSPFNLIIRRIAIAKILIHVSFMSIIMCTILTNCVF  | 148                               |      |
| <a href="#">XP_850134.1</a>    | 99           | RGKTLFRFSATPALYILSPFNLIIRRIAIAKILIHVSFMSIIMCTILTNCVF  | 148                               |      |
| <a href="#">NP_001180031.1</a> | 99           | RGKTLFRFSATPALYILSPFNLIIRRIAIAKILIHVSFMSIIMCTILTNCVF  | 148                               |      |
| <a href="#">NP_001070967.1</a> | 99           | RGKTLFRFSATPALYILSPFNLIIRRIAIAKILIHVSFMSIIMCTILTNCVF  | 148                               |      |
| <a href="#">NP_062139.2</a>    | 99           | RGKTLFRFSATPALYILSPFNLIIRRIAIAKILIHVSFMSIIMCTILTNCVF  | 148                               |      |
| <a href="#">XP_003643160.1</a> | 99           | RGKTLFRFSATPALYILSPFNLIIRRIAIAKILIHVSFMSIIMCTILTNCVF  | 148                               |      |
| <a href="#">NP_001038648.1</a> | 101          | KGKTIIFRFSATPSLYIISPFNLFRQIAIAKILIHVSFMSIIMCTILTNCVF  | 150                               |      |
| <a href="#">NP_571703.1</a>    | 99           | KGKTIIFRFSATPALYIMISPFNLARRIAIAKILIHVSFMSIIMCTILTNCVF | 148                               |      |
| <a href="#">XP_004911965.1</a> |              | -----                                                 |                                   |      |
| <br>                           |              |                                                       |                                   |      |
| <a href="#">NP_055006.1</a>    | 149          | MTFSNPPDWSKNVEYTFGTGIYTFESLVKIIARGFCIDGFTFLRDPWNWLD   | 198                               |      |
| <a href="#">XP_001141985.3</a> | 149          | MTFSNPPDWSKNVEYTFGTGIYTFESLVKIIARGFCIDGFTFLRDPWNWLD   | 198                               |      |
| <a href="#">XP_001090295.1</a> | 149          | MTFSNPPDWSKNVEYTFGTGIYTFESLVKIIARGFCIDGFTFLRDPWNWLD   | 198                               |      |
| <a href="#">XP_850134.1</a>    | 149          | MTFSNPPDWSKNVEYTFGTGIYTFESLVKIIARGFCIDGFTFLRDPWNWLD   | 198                               |      |
| <a href="#">NP_001180031.1</a> | 149          | MTFSNPPDWSKNVEYTFGTGIYTFESLVKIIARGFCIDGFTFLRDPWNWLD   | 198                               |      |
| <a href="#">NP_001070967.1</a> | 149          | MTFSNPPDWSKNVEYTFGTGIYTFESLVKIIARGFCIDGFTFLRDPWNWLD   | 198                               |      |
| <a href="#">NP_062139.2</a>    | 149          | MTFSNPPDWSKNVEYTFGTGIYTFESLVKIIARGFCIDGFTFLRDPWNWLD   | 198                               |      |
| <a href="#">XP_003643160.1</a> | 149          | MTFSNPPDWSKNVEYTFGTGIYTFESLVKIIARGFCIDGFTFLRDPWNWLD   | 198                               |      |
| <a href="#">NP_001038648.1</a> | 151          | MTFSNPPDWSKNVEYTFGTGIYTFESLVKIIARGFCIDGFTFLRDPWNWLD   | 200                               |      |
| <a href="#">NP_571703.1</a>    | 149          | MTFSNPPDWSKNVEYTFGTGIYTFESLVKIIARGFCIDGFTFLRDPWNWLD   | 198                               |      |
| <a href="#">XP_004911965.1</a> |              | -----                                                 |                                   |      |

NP\_055006.1 199 FSVIMMAYITEFVNLGNVSALRTFRVLRALKTISVIPGLKTI VGALIQSV 248  
XP\_001141985.3 199 FSVIMMAYVTEFVDLGNVSALRTFRVLRALKTISVIPGLKTI VGALIQSV 248  
XP\_001090295.1 199 FSVIMMAYITEFVNLGNVSALRTFRVLRALKTISVIPGLKTI VGALIQSV 248  
XP\_850134.1 199 FSVIMMAYITEFVNLGNVSALRTFRVLRALKTISVIPGLKTI VGALIQSV 248  
NP\_001180031.1 199 FSVIMMAYITEFVNLGNVSALRTFRVLRALKTISVIPGLKTI VGALIQSV 248  
NP\_001070967.1 199 FSVIMMAYITEFVNLGNVSALRTFRVLRALKTISVIPGLKTI VGALIQSV 248  
NP\_062139.2 199 FSVIMMAYVTEFVDLGNVSALRTFRVLRALKTISVIPGLKTI VGALIQSV 248  
XP\_003643160.1 199 FSVIMMAYVTEFVDLGNVSALRTFRVLRALKTISVIPGLKTI VGALIQSV 248  
NP\_001038648.1 201 FMVISMAYVTEFVDLGNVSALRTFRVLRALKTISVIPRLKTI VGALIQSV 250  
NP\_571703.1 199 FMVISMAYVTEFVDLGNVSALRTFRVLRALKTISVIPGLKTI VGALIQSV 248  
XP\_004911965.1 -----

NP\_055006.1 249 KKLSDVMILTVFCLSVFALIGLQLFMGNLRNKC VVWP INFN ESYL- ENGT 297  
XP\_001141985.3 249 KKLSDVMILTVFCLSVFALIGLQLFMGNLRNKC VVWP INFN ESYL- ENGT 297  
XP\_001090295.1 249 KKLSDVMILTVFCLSVFALIGLQLFMGNLRNKC VVWP INFN ESYL- ENGT 297  
XP\_850134.1 249 KKLSDVMILTVFCLSVFALIGLQLFMGNLRNKC VVWP INFN ESYL- ENGT 297  
NP\_001180031.1 249 KKLSDVMILTVFCLSVFALIGLQLFMGNLRNKC VVWP INFN ESYL- ENGT 297  
NP\_001070967.1 249 KKLSDVMILTVFCLSVFALIGLQLFMGNLRNKC VVWP INFN ESYL- ENGT 297  
NP\_062139.2 249 KKLSDVMILTVFCLSVFALIGLQLFMGNLRNKC VVWP INFN ESYL- ENGT 297  
XP\_003643160.1 249 KKLSDVMILTVFCLSVFALIGLQLFMGNLRNKC VWP INVNETYL- DNGS 297  
NP\_001038648.1 251 KKLSDVMILTVFCLSVFALIGLQLFMGNLRKQCVIWPVNSTETYL- ANG S 299  
NP\_571703.1 249 KKLSDVMILTVFCLSVFALIGLQLFMGNLRKQCVIWPINITEMFPDVNGS 298  
XP\_004911965.1 -----

NP\_055006.1 298 KGFDWEEYINNKTNFYTVPGMLEP L LCGNSSDAGQCPEGYQCMKAGRNP N 347  
XP\_001141985.3 298 KGFDWEEYINNKTNFYTVPGMLEP L LCGNSSDAGQCPEGYQCMKAGRNP N 347  
XP\_001090295.1 298 KGFDWEEYINNKTNFYTVPGMLEP L LCGNSSDAGQCPEGYQCMKAGRNP N 347  
XP\_850134.1 298 KGFDWEEYINNKTNFYIVPGMLEP L LCGNSSDAGQCPEGYQCMKAGRNP N 347  
NP\_001180031.1 298 KGFDWEEYINNKTNFYIVPGMLEP L LCGNSSDAGQCPEGYQCMKAGRNP N 347  
NP\_001070967.1 298 RGFDWEEYINNKTNFYVMVPGMLEP L LCGNSSDAGQCPEGFQCMKAGRNP N 347  
NP\_062139.2 298 RGFDWEEYINNKTNFYVMVPGMLEP L LCGNSSDAGQCPEGFQCMKAGRNP N 347  
XP\_003643160.1 298 RGFDWEEYTNMNSNFYIIPGAPDPL LCGNSSDAGQCPEGYTCMKAGRNP N 347  
NP\_001038648.1 300 KGFDWEEYIMNDTNFYFLPGMLDALLCGNSSD SGRCP EGYTCMKAGRNP N 349  
NP\_571703.1 299 RAFNWDEYILNETNFYFLPDQLDALLCGNSSD SGRCP EGYTCMKAGRNP N 348  
XP\_004911965.1 -----

NP\_055006.1 348 YGYTSFDTFSWAF LALFRLMTQDYWENLYQLTLRAAGKTYMIFFVLVIFV 397  
XP\_001141985.3 348 YGYTSFDTFSWAF LALFRLMTQDYWENLYQLTLRAAGKTYMIFFVLVIFV 397  
XP\_001090295.1 348 YGYTSFDTFSWAF LALFRLMTQDYWENLYQLTLRAAGKTYMIFFVLVIFV 397  
XP\_850134.1 348 YGYTSFDTFSWAF LALFRLMTQDYWENLYQLTLRAAGKTYMIFFVLVIFV 397  
NP\_001180031.1 348 YGYTSFDTFSWAF LALFRLMTQDYWENLYQLTLRAAGKTYMIFFVLVIFV 397  
NP\_001070967.1 348 YGYTSFDTFSWAF LALFRLMTQDYWENLYQLTLRAAGKTYMIFFVLVIFV 397  
NP\_062139.2 348 YGYTSFDTFSWAF LALFRLMTQDYWENLYQLTLRAAGKTYMIFFVLVIFV 397  
XP\_003643160.1 348 YGYTSFDTFSWAF LALFRLMTQDFWENLYQLTLRAAGKTYMIFFVLVIFV 397  
NP\_001038648.1 350 YGYTSFDSFGWAF LALFRLMTQDFWENLYQLTLRAAGKTYMIFFVLVIFV 399  
NP\_571703.1 349 YGYTSFDSFGWAF LALFRLMTQDFWENLYQLTLRAAGKTYMIFFVLVIFV 398  
XP\_004911965.1 1 -----MIFFVLVIFV 10

NP\_055006.1 398 GSFYLVN LILAVVAMAYEEQNQATLEEA EQKEAEFKAMLEQLKKQEEAQ 447  
XP\_001141985.3 398 GSFYLVN LILAVVAMAYEEQNQATLEEA EQKEAEFKAMLEQLKKQEEAQ 447  
XP\_001090295.1 398 GSFYLVN LILAVVAMAYEEQNQATLEEA EQKEAEFKAMLEQLKKQEEAQ 447  
XP\_850134.1 398 GSFYLVN LILAVVAMAYEEQNQATLEEA EQKEAEFKAMLEQLKKQEEAQ 447  
NP\_001180031.1 398 GSFYLVN LILAVVAMAYEEQNQATLEEA EQKEAEFKAMLEQLKKQEEAQ 447  
NP\_001070967.1 398 GSFYLVN LILAVVAMAYEEQNQATLEEA EQKEAEFKAMLEQLKKQEEAQ 447  
NP\_062139.2 398 GSFYLVN LILAVVAMAYEEQNQATLEEA EQKEAEFKAMLEQLKKQEEAQ 447  
XP\_003643160.1 398 GSFYLVN LILAVVAMAYEEQNQATLEEA EQKEAEFKAMLEQLKKQEEAQ 447  
NP\_001038648.1 400 GSFYLVN LILAVVAMAYEEQNQATIEEA EQKEAEFKAMLEQLKKQEEAQ 449  
NP\_571703.1 399 GSFYLVN LILAVVAMAYEEQNQATMEEA ERKEAEFKAMLEQLKKQEEAQ 448  
XP\_004911965.1 11 GSFYLVN LILAVVAMAYEEQNQATLEEA ERKENEFKAMLEQM KRMQEEAQ 60

NP\_055006.1 448 AAAMATSAGTVSEDAIEEEGEEGGSPRS SSE ISKLSSKSAKERRNRKK 497  
XP\_001141985.3 448 AAAMATSAGTVSEDAIEEEGEEGGSPRS SSE ISKLSSKSAKERRNRKK 497  
XP\_001090295.1 448 AAAMATSAGTVSEDAIEEEGEEGGSPRS SSE ISKLSSKSAKERRNRKK 497  
XP\_850134.1 448 AAAMATSAGTVSEDAIEEEGEEGAGSPRS SSE ISKLSSKSAKERRNRKK 497  
NP\_001180031.1 448 AAAMATSAGTVSEDAIEEEGEDGAGSPRS SSE ISKLSSKSAKERRNRKK 497  
NP\_001070967.1 448 AAAMATSAGTVSEDAIEEEGEDGVGSPRS SSEL SKLSSKSAKERRNRKK 497  
NP\_062139.2 448 AAAMATSAGTVSEDAIEEEGEDGVGSPRS SSEL SKLSSKSAKERRNRKK 497  
XP\_003643160.1 448 AAAMVTSAGTVSEDAVEDDG- -GGRMSRS SSE ISKLSSKSAKERRNRKK 495  
NP\_001038648.1 450 ANAMATSAGTVSEDAVEDDG- -GHLRS SSEVSKLSSKSAKERRNRKK 497  
NP\_571703.1 449 ANAMATSAGTVSEDVVEDDGDGEGN LSCSS SEMSKLSSKSAKERRNRKK 498  
XP\_004911965.1 61 AAANATSAGTVTEDAVEDEGE- ARMSHTSSEFSKPSKSAKERRNRKK 109

NP\_055006.1 498 RKQKELSEGE EKGDP EKVFKSE SEDGMRRKAFRLPDNRIGRKFSIMNQSL 547  
XP\_001141985.3 498 RKQKELSEGE EKGDP EKVFKSE SEDGMRRKAFRLPDNRIGRKFSIMNQSL 547  
XP\_001090295.1 498 RKQKELSEGE EKGDP EKVFKSE SEDGMRRKAFRLPDNRIGRKFSIMNQSL 547  
XP\_850134.1 498 RKQKELSEGE EKGDP EKVFKSE SEDGMRRKGFRLPDNRIGRKFSIMNQSL 547  
NP\_001180031.1 498 RKQKELSEGE EKGDP EKVFKSE SEDGMRRKGFRLPDNRIGRKFSIMNQSL 547  
NP\_001070967.1 498 RKQKELSEGE EKGDP EKVFKSE SEDGMRRKAFRLPDNRIGRKFSIMNQSL 547  
NP\_062139.2 498 RKQKELSEGE EKGDP EKVFKSE SEDGMRRKAFRLPDNRIGRKFSIMNQSL 547  
XP\_003643160.1 496 RKDKELSEGE EKGDN EKVFKSE SEDGMRRKAFRLPDNRIGRKFSIMNQSL 545  
NP\_001038648.1 498 WRKEQ- -E- -EKGDS EKVFKSE SDGSKRSRFRFRDNR LGRKASIMNQSL 543  
NP\_571703.1 499 WRQKE- -QDKEKGDSEK FVKSE SDDGSR- -RFRFPDNR LGRRSSIMNQSL 545  
XP\_004911965.1 110 RKQKELSEGE EKGDS EKVFKSE SEDGVKRRGFWYPDNR LGRRFSSIMNQSL 159

|                |     |                                                    |     |
|----------------|-----|----------------------------------------------------|-----|
| NP_055006.1    | 548 | LSIPGSPFLSRHNSKSSIFSFRGPGFRDPGSENEFADDEHSTVEESEGR  | 597 |
| XP_001141985.3 | 548 | LSIPGSPFLSRHNSKSSIFSFRGPGFRDPGSENEFADDEHSTVEESEGR  | 597 |
| XP_001090295.1 | 548 | LSIPGSPFLSRHNSKSSIFSFRGPGFRDPGSENEFADDEHSTVEESEGR  | 597 |
| XP_850134.1    | 548 | LSIPGSPFLSRHNSKSSIFSFRGPGFRDPGSENEFADDEHSTVEESEGR  | 597 |
| NP_001180031.1 | 548 | LSIPGSPFLSRHNSKSSIFSFRGPGFRDPGSENEFADDEHSTVEESEGR  | 597 |
| NP_001070967.1 | 548 | LSIPGSPFLSRHNSKSSIFSFRGPGFRDPGSENEFADDEHSTVEESEGR  | 597 |
| NP_062139.2    | 548 | LSIPGSPFLSRHNSKSSIFSFRGPGFRDPGSENEFADDEHSTVEESEGR  | 597 |
| XP_003643160.1 | 546 | LSIPGSPFLSRHNSKSSIFSFK--GRFRDPGSENEFADDEHSTVEESEGR | 593 |
| NP_001038648.1 | 544 | LSIPGSPFMSRR---SSIFS-----KGSSENEFADDEHSTVEESED     | 582 |
| NP_571703.1    | 546 | LSIPGSPFMSRRNSKSSIFSRC-----KDGSENEFADDEHSTVEEYDER  | 590 |
| XP_004911965.1 | 160 | LSIPGSPYLSRHNSKSSIFSFR--GRFRDPVSENEFADDEHSTVEESEGR | 207 |

|                |     |                                                     |     |
|----------------|-----|-----------------------------------------------------|-----|
| NP_055006.1    | 598 | RDSLFIPIRARERRSSSYSGYSGYSGQSRSSRIFFSLRRSVKRNSTVDCNG | 647 |
| XP_001141985.3 | 598 | RDSLFIPIRARERRSSSYSGYSGYSGQSRSSRIFFSLRRSVKRNSTVDCNG | 647 |
| XP_001090295.1 | 598 | RDSLFIPIRARERRSSSYSGYSGYSGQSRSSRIFFSLRRSVKRNSTVDCNG | 647 |
| XP_850134.1    | 598 | RDSLFIPIRARERRSSSYSGYSGYSGQSRSSRIFFSLRRSVKRNSTVDCNG | 647 |
| NP_001180031.1 | 598 | RDSLFIPIRARERRSSSYSGYSGYSGQSRSSRIFFSLRRSVKRNSTVDCNG | 647 |
| NP_001070967.1 | 598 | RDSLFIPIRARERRSSSYSGYSGYSGQSRSSRIFFSLRRSVKRNSTVDCNG | 647 |
| NP_062139.2    | 598 | RDSLFIPIRARERRSSSYSGYSGYSGQSRSSRIFFSLRRSVKRNSTVDCNG | 647 |
| XP_003643160.1 | 594 | RDSLFIPIRGRDRSSSYSGYSGYSGQSRSSRIFFPNLRNRIKRNSTVDCNG | 643 |
| NP_001038648.1 | 583 | RGSFLVFP---YRRSSYSGYSGQSSRINPLAPHP---GCKRNSTVDCNG   | 624 |
| NP_571703.1    | 591 | RDSFLSP---QRRSSYTGFG-----KRNSTVDCNG                 | 618 |
| XP_004911965.1 | 208 | RDSLFIPVRGHDRNSYN--SGYSGQSRSSRIQLNLRNPNKRNSTVDCNG   | 255 |

|                |     |                                                     |     |
|----------------|-----|-----------------------------------------------------|-----|
| NP_055006.1    | 648 | VVSLIGPGGSHI--GGRLLPE-----ATTEVEIKKKGPGSLLVSM       | 685 |
| XP_001141985.3 | 648 | VVSLIGPGGSHI--GGRLLPE-----ATTEVEIKKKGPGSLLVSM       | 685 |
| XP_001090295.1 | 648 | VVSLIGPGGSHI--GGRLLPE-----ATTEVEIRKKGPGSLLVSM       | 685 |
| XP_850134.1    | 648 | VVSLIGPGGSHI--GGRLLPE-----ATTEVEIKKKGPGSLLVSM       | 685 |
| NP_001180031.1 | 648 | VVSLIGPGGSHI--GGRLLPE-----ATTEVEIKKKGPGSLLVSM       | 685 |
| NP_001070967.1 | 648 | VVSLI--GPGGSHI--GRLLE-----ATTEVEIKKKGPGSLLVSM       | 683 |
| NP_062139.2    | 648 | VVSLI--GPGGSHI--GRLLE-----ATTEVEIKKKGPGSLLVSM       | 683 |
| XP_003643160.1 | 644 | VVSLIGPPSSMPGGRLLPE-----GTTEIEIKKKGPGSLLVSM         | 682 |
| NP_001038648.1 | 625 | VVSLI--GPG---P--GRLLE-----TTEVEGKRKHGSLMVS          | 657 |
| NP_571703.1    | 619 | VVSLI--GPG---PGGRLLPE-----PTTDLEIKKKLSGSLMVS        | 653 |
| XP_004911965.1 | 256 | VVSLIGPGGSPNIPGGRLLPEVKIDKAATDDSPTEVEVKRKP SGSLRVSM | 305 |

|                |     |                                                      |     |
|----------------|-----|------------------------------------------------------|-----|
| NP_055006.1    | 686 | DQL--ASYGRKDRINSIMSVVNTLVEELEEESQRKCPPCWYKFANTFLIWE  | 734 |
| XP_001141985.3 | 686 | DQL--ASYGRKDRINSIMSVVNTLVEELEEESQRKCPPCWYKFANTFLIWE  | 734 |
| XP_001090295.1 | 686 | DQL--ASYGRKDRINSIMSVVNTLVEELEEESQRKCPPCWYKFANTFLIWE  | 734 |
| XP_850134.1    | 686 | DQL--ASYGRKDRINSILSVVNTLVEELEEESQRKCPPCWYKFANTFLIWE  | 734 |
| NP_001180031.1 | 686 | DQL--ASYGRKDRINSILSVVNTLVEELEEESQRKCPPCWYKFANTFLIWE  | 734 |
| NP_001070967.1 | 684 | EQL--ASYGRKDRINSIMSVVNTLVEELEEESQRKCPPCWYKFANTFLIWE  | 732 |
| NP_062139.2    | 684 | DQL--ASYGRKDRINSIMSVVNTLVEELEEESQRKCPPCWYKFANTFLIWE  | 732 |
| XP_003643160.1 | 683 | DQVNASYGRKDRNTSVMTGLTNTLVEELEEESQRKCPPCWYKFANTFLIWE  | 732 |
| NP_001038648.1 | 658 | DQLNTSFSRKERANSAMTVVNTLVEELEEESQRKCPPCWYKFANTFLIWE   | 707 |
| NP_571703.1    | 654 | EQLNTSFSRKERANSVMSALTNTLVEELEEESQRKCPPCWYKFANTFLIWE  | 703 |
| XP_004911965.1 | 306 | DQLTASFGRK--RANSILSVVTQTLVEELEEESQRKCPPCWYKFADTYLIWT | 354 |

|                |     |                                                      |     |
|----------------|-----|------------------------------------------------------|-----|
| NP_055006.1    | 735 | CHPYWIKLKEIVNLIIVMDPPVDLAIITICIVLNTLFMAMEHHMPMPQFEHV | 784 |
| XP_001141985.3 | 735 | CHPYWIKLKEIVNLIIVMDPPVDLAIITICIVLNTLFMAMEHHMPMPQFEHV | 784 |
| XP_001090295.1 | 735 | CHPYWIKLKEIVNLIIVMDPPVDLAIITICIVLNTLFMAMEHHMPMPQFEHV | 784 |
| XP_850134.1    | 735 | CHPYWIKLKEIVNLIIVMDPPVDLAIITICIVLNTLFMAMEHHMPMPQFEHV | 784 |
| NP_001180031.1 | 735 | CHPYWIKLKEIVNLIIVMDPPVDLAIITICIVLNTLFMAMEHHMPMPQFEHV | 784 |
| NP_001070967.1 | 733 | CHPYWIKLKEIVNLIIVMDPPVDLAIITICIVLNTLFMAMEHHMPMPQFEHV | 782 |
| NP_062139.2    | 733 | CHPYWIKLKEIVNLIIVMDPPVDLAIITICIVLNTLFMAMEHHMPMPQFEHV | 782 |
| XP_003643160.1 | 733 | CHPYWIKLKEIVNLIIVMDPPVDLAIITICIVLNTLFMAMEHHMPTEFEHV  | 782 |
| NP_001038648.1 | 708 | CCPIWIKIKEIVNLIIVMDPPVDLAIITICIVLNTLFMAMEHYPMTPRFEV  | 757 |
| NP_571703.1    | 704 | CGPLWMSIKEIVNLIIVMDPPVDLAIITICIVLNTLFMAMEHYPMTPQFEHV | 753 |
| XP_004911965.1 | 355 | CCPLWIRIKTIVNMIIVMDPPVDLTITICIVLNTLFMAMEHYPMTPHFENV  | 404 |

|                |     |                                                   |     |
|----------------|-----|---------------------------------------------------|-----|
| NP_055006.1    | 785 | LAVGNLVFTGIFTAEMFLKLIAMDPIYFQEGWNIFDGFIVSLSLMELSL | 834 |
| XP_001141985.3 | 785 | LAVGNLVFTGIFTAEMFLKLIAMDPIYFQEGWNIFDGFIVSLSLMELSL | 834 |
| XP_001090295.1 | 785 | LAVGNLVFTGIFTAEMFLKLIAMDPIYFQEGWNIFDGFIVSLSLMELSL | 834 |
| XP_850134.1    | 785 | LAVGNLVFTGIFTAEMFLKLIAMDPIYFQEGWNIFDGFIVSLSLMELGL | 834 |
| NP_001180031.1 | 785 | LAVGNLVFTGIFTAEMFLKLIAMDPIYFQEGWNIFDGFIVSLSLMELSL | 834 |
| NP_001070967.1 | 783 | LAVGNLVFTGIFTAEMFLKLIAMDPIYFQEGWNIFDGFIVSLSLMELGL | 832 |
| NP_062139.2    | 783 | LAVGNLVFTGIFTAEMFLKLIAMDPIYFQEGWNIFDGFIVSLSLMELSL | 832 |
| XP_003643160.1 | 783 | LSVGNLVFTGIFTAEMFLKLIAMDPIYFQEGWNIFDGFIVSLSLMELSL | 832 |
| NP_001038648.1 | 758 | LSVGNLVFTGIFTAEMFAKLIAMDPIYFQEGWNIFDGFIVSLSLVELGL | 807 |
| NP_571703.1    | 754 | LSVGNLVFTGIFTAEMFAKLAMDPIYFQEGWNIFDGFIVSLSLMELGL  | 803 |
| XP_004911965.1 | 405 | LAVGNLVFTGIFTAEMFLKLIAMDPIYFQEGWNIFDGFIVSLSLMELGL | 454 |

|                |     |                                                   |     |
|----------------|-----|---------------------------------------------------|-----|
| NP_055006.1    | 835 | ADVEGLSVLRSFRLLRVFKLAKSWPTLNMLIKIIGNSVGALGNLTLVLA | 884 |
| XP_001141985.3 | 835 | ADVEGLSVLRSFRLLRVFKLAKSWPTLNMLIKIIGNSVGALGNLTLVLA | 884 |
| XP_001090295.1 | 835 | ADVEGLSVLRSFRLLRVFKLAKSWPTLNMLIKIIGNSVGALGNLTLVLA | 884 |
| XP_850134.1    | 835 | ADVEGLSVLRSFRLLRVFKLAKSWPTLNMLIKIIGNSVGALGNLTLVLA | 884 |
| NP_001180031.1 | 835 | ADVEGLSVLRSFRLLRVFKLAKSWPTLNMLIKIIGNSVGALGNLTLVLA | 884 |
| NP_001070967.1 | 833 | ADVEGLSVLRSFRLLRVFKLAKSWPTLNMLIKIIGNSVGALGNLTLVLA | 882 |
| NP_062139.2    | 833 | ADVEGLSVLRSFRLLRVFKLAKSWPTLNMLIKIIGNSVGALGNLTLVLA | 882 |
| XP_003643160.1 | 833 | ANVEGLSVLRSFRLLRVFKLAKSWPTLNMLIKIIGNSVGALGNLTLVLA | 882 |
| NP_001038648.1 | 808 | ADVEGLSVLRSFRLLRVFKLAKSWPTLNMLIKIIGNSVGALGNLTLVLA | 857 |
| NP_571703.1    | 804 | ANVEGLSVLRSFRLLRVFKLAKSWPTLNMLIKIIGNSVGALGNLTLVLA | 853 |
| XP_004911965.1 | 455 | QDVEGLSVLRSFRLLRVFKLAKSWPTLNMLIKIIGNSVGALGNLTLVLA | 504 |

|                                |     |                                                     |     |
|--------------------------------|-----|-----------------------------------------------------|-----|
| <a href="#">NP_055006.1</a>    | 885 | IVFIFAVVGMQLFGKSYKECVCKINQDCELPRWHMHDFHHSFLIVFRVLC  | 934 |
| <a href="#">XP_001141985.3</a> | 885 | IVFIFAVVGMQLFGKSYKECVCKINQDCELPRWHMHDFHHSFLIVFRVLC  | 934 |
| <a href="#">XP_001090295.1</a> | 885 | IVFIFAVVGMQLFGKSYKECVCKINQDCELPRWHMHDFHHSFLIVFRVLC  | 934 |
| <a href="#">XP_850134.1</a>    | 885 | IVFIFAVVGMQLFGKSYKECVCKINQDCELPRWHMHDFHHSFLIVFRVLC  | 934 |
| <a href="#">NP_001180031.1</a> | 885 | IVFIFAVVGMQLFGKSYKECVCKINQDCELPRWHMHDFHHSFLIVFRVLC  | 934 |
| <a href="#">NP_001070967.1</a> | 883 | IVFIFAVVGMQLFGKSYKECVCKISQECKLPRWHMNDFFHHSFLIVFRVLC | 932 |
| <a href="#">NP_062139.2</a>    | 883 | IVFIFAVVGMQLFGKSYKECVCKINQECKLPRWHMNDFFHHSFLIVFRVLC | 932 |
| <a href="#">XP_003643160.1</a> | 883 | IVFIFAVVGMQLFGKSYKECVCKINPECELPRWHMHDFHHSFLIVFRVLC  | 932 |
| <a href="#">NP_001038648.1</a> | 858 | IVFIFAVVGMQLFGKSYKDCVCKIAESCELPRWHMNDFFHHSFLIVFRVLC | 907 |
| <a href="#">NP_571703.1</a>    | 854 | IVFIFAVVGMQLFGKSYKDCVCKIAQDCELPRWHMNDFFHHSFLIVFRVLC | 903 |
| <a href="#">XP_004911965.1</a> | 505 | IVFIFAVVGMQLFGKSYKDCVCKINPECVLPRWHMNDFFHHSFLIVFRVLC | 554 |

|                                |     |                                                    |     |
|--------------------------------|-----|----------------------------------------------------|-----|
| <a href="#">NP_055006.1</a>    | 935 | GEWIETMWDCMEVAGQAMCLIVFMMVMVIGNLVVLNLFALLLLSSFSADN | 984 |
| <a href="#">XP_001141985.3</a> | 935 | GEWIETMWDCMEVAGQAMCLIVFMMVMVIGNLVVLNLFALLLLSSFSADN | 984 |
| <a href="#">XP_001090295.1</a> | 935 | GEWIETMWDCMEVAGQAMCLIVFMMVMVIGNLVVLNLFALLLLSSFSADN | 984 |
| <a href="#">XP_850134.1</a>    | 935 | GEWIETMWDCMEVAGQAMCLIVFMMVMVIGNLVVLNLFALLLLSSFSADN | 984 |
| <a href="#">NP_001180031.1</a> | 935 | GEWIETMWDCMEVAGQAMCLIVFMMVMVIGNLVVLNLFALLLLSSFSADN | 984 |
| <a href="#">NP_001070967.1</a> | 933 | GEWIETMWDCMEVAGQAMCLIVFMMVMVIGNLVVLNLFALLLLSSFSADN | 982 |
| <a href="#">NP_062139.2</a>    | 933 | GEWIETMWDCMEVAGQAMCLIVFMMVMVIGNLVVLNLFALLLLSSFSADN | 982 |
| <a href="#">XP_003643160.1</a> | 933 | GEWIETMWDCMEVAGQAMCLIVFMMVMVIGNLVVLNLFALLLLSSFSADN | 982 |
| <a href="#">NP_001038648.1</a> | 908 | GEWIETMWDCMEVAGQSMCLIVFMMVMVIGNLVVLNLFALLLLSSFSADN | 957 |
| <a href="#">NP_571703.1</a>    | 904 | GEWIETMWDCMEVAGQAMCLIVFMMVMVIGNLVVLNLFALLLLSSFSADN | 953 |
| <a href="#">XP_004911965.1</a> | 555 | GEWIETMWDCMEVAGQAMCIIVFMMVMVIGNLVVLNLFALLLLSSFSADN | 604 |

|                                |     |                                                    |      |
|--------------------------------|-----|----------------------------------------------------|------|
| <a href="#">NP_055006.1</a>    | 985 | LAATDDDGEMNNLQISVIRIKKGVAWTKLVHAFMQAHFKQR-EADEVKP  | 1033 |
| <a href="#">XP_001141985.3</a> | 985 | LAATDDDGEMNNLQISVIRIKKGVAWTKLVHAFMQAHFKQR-EADEVKP  | 1033 |
| <a href="#">XP_001090295.1</a> | 985 | LAATDDDGEMNNLQISVIRIKKGVAWTKLVHAFMQAHFKQR-EADEVKP  | 1033 |
| <a href="#">XP_850134.1</a>    | 985 | LAATDDDGEMNNLQISVIRIKKGVAWTKLVHAFMQAHFKQR-EADEVKP  | 1033 |
| <a href="#">NP_001180031.1</a> | 985 | LAATDDDGEMNNLQISVIRIKKGVAWTKLVHAFMQAHFKQR-EADEVKP  | 1033 |
| <a href="#">NP_001070967.1</a> | 983 | LAATDDDGEMNNLQISVIRIKKGVAWTKLVHAFMQAHFKQR-EADEVKP  | 1031 |
| <a href="#">NP_062139.2</a>    | 983 | LAATDDDGEMNNLQISVIRIKKGVAWTKLVHAFMQAHFKQR-EADEVKP  | 1031 |
| <a href="#">XP_003643160.1</a> | 983 | LAATDDDGEMNNLQISVIRIKKGIAWTKAKVREFMQAHFKQR-EADEVKP | 1031 |
| <a href="#">NP_001038648.1</a> | 958 | LAATDDDGEMNNLQISVIRIKKGIAWFKIHVRLLVAHVKKKPLEDEDKP  | 1007 |
| <a href="#">NP_571703.1</a>    | 954 | LAASDDDGEMNNLQIAVIRIKKGIAWVKAKVRELVNIILGRK-VTDEAKP | 1002 |
| <a href="#">XP_004911965.1</a> | 605 | LAATDDDGEMNNLQISVIRIKKGIAWIKLKAHDFMQKHFKKK-DADEVKP | 653  |

|                                |      |                                                     |      |
|--------------------------------|------|-----------------------------------------------------|------|
| <a href="#">NP_055006.1</a>    | 1034 | LDELYEKKANCIANHTGADI-HRNGDFQKNGNGTTSIGIGSSVEKYIIDED | 1082 |
| <a href="#">XP_001141985.3</a> | 1034 | LDELYEKKANCIANHTGADI-HRNGDFQKNGNGTTSIGIGSSVEKYIIDED | 1082 |
| <a href="#">XP_001090295.1</a> | 1034 | LDELYEKKANCIANHTGADI-HRNGDFQKNGNGTTSIGIGSSVEKYIIDED | 1082 |
| <a href="#">XP_850134.1</a>    | 1034 | LDELYEKKANCIANHTGADI-HRNGDFQKNGNGTTSIGIGSSVEKYIIDED | 1082 |
| <a href="#">NP_001180031.1</a> | 1034 | LDELYEKKANCIANHTGADI-HRNGDFQKNGNGTTSIGIGSSVEKYIIDED | 1082 |
| <a href="#">NP_001070967.1</a> | 1032 | LDELYEKKANCIANHTGVDI-HRNGDFQKNGNGTTSIGIGSSVEKYIIDED | 1080 |
| <a href="#">NP_062139.2</a>    | 1032 | LDELYEKKANCIANHTGVDI-HRNGDFQKNGNGTTSIGIGSSVEKYIIDED | 1080 |
| <a href="#">XP_003643160.1</a> | 1032 | LDELYDKKVNCIANHTGADI-HRDIDYQKNGNGTTSIGIGSSVEKYIIDED | 1080 |
| <a href="#">NP_001038648.1</a> | 1008 | LDDMYDKKLNLMGNHTGVEIKCGDLNYPKNGNGTTSIGIGSSVGKYMIDEE | 1057 |
| <a href="#">NP_571703.1</a>    | 1003 | LDDMYDRKLNCIANHTGVDI-SRDLDYQKNGNGTTSIGIGSSVGKYMIDDD | 1051 |
| <a href="#">XP_004911965.1</a> | 654  | LDEMYEKKMNCLANNTGADI-HRDMYPKNGNGTTSIGIGSSVEKYMIDED  | 702  |

|                                |      |                                                     |      |
|--------------------------------|------|-----------------------------------------------------|------|
| <a href="#">NP_055006.1</a>    | 1083 | HMSFINNPNTVTRVPIAVGESDFENLNTEDVSSSEDPEGSKDKLDDTSSS  | 1132 |
| <a href="#">XP_001141985.3</a> | 1083 | HMSFINNPNTVTRVPIAVGESDFENLNTEDVSSSEDPEGSKDKLDDTSSS  | 1132 |
| <a href="#">XP_001090295.1</a> | 1083 | HMSFINNPNTVTRVPIAVGESDFENLNTEDVSSSEDPEGSKDKLDDTSSS  | 1132 |
| <a href="#">XP_850134.1</a>    | 1083 | HMSFINNPNTVTRVPIAVGESDFENLNTEDVSSSEDPEGSKDKLDDTSSS  | 1132 |
| <a href="#">NP_001180031.1</a> | 1083 | HMSFINNPNTVTRVPIAVGESDFENLNTEDVSSSEDPEGSKDKLDDTSSS  | 1132 |
| <a href="#">NP_001070967.1</a> | 1081 | HMSFINNPNTVTRVPIAVGESDFENLNTEDVSSSEDPEGSKDKLDDTSSS  | 1130 |
| <a href="#">NP_062139.2</a>    | 1081 | HMSFINNPNTVTRVPIAVGESDFENLNTEDVSSSEDPEGSKDKLDDTSSS  | 1130 |
| <a href="#">XP_003643160.1</a> | 1081 | HMSFINNPNTVTRVPIAVGESDFENLNTEDFSSDTPDGSKDKLDDTSSS   | 1130 |
| <a href="#">NP_001038648.1</a> | 1058 | PMSFIHNPNTVTRVPIAVGGSDFENLNTEDFSSSESDVENSKD-LDDTSSS | 1106 |
| <a href="#">NP_571703.1</a>    | 1052 | HMSFIHNPNTVTCVPIAVGESDFENLNTEDFSSSESEAGSKE-LDDISSS  | 1100 |
| <a href="#">XP_004911965.1</a> | 703  | HMSFIHNPNTVTKVPIAVGESDFENLNTEDFSSASDEEGSKDKLDDTSSS  | 752  |

|                                |      |                                                     |      |
|--------------------------------|------|-----------------------------------------------------|------|
| <a href="#">NP_055006.1</a>    | 1133 | EGSTIDIKPEVEE-VPVEQPPEEYLDPDACFTEGCVQRFKCCQVNIIEGLG | 1181 |
| <a href="#">XP_001141985.3</a> | 1133 | EGSTIDIKPEVEE-VPVEQPPEEYLDPDACFTEGCVQRFKCCQVNIIEGLG | 1181 |
| <a href="#">XP_001090295.1</a> | 1133 | EGSTIDIKPEVEE-VPVEQPPEEYLDPDACFTEGCVQRFKCCQVNIIEGLG | 1181 |
| <a href="#">XP_850134.1</a>    | 1133 | EGSTIDIKPEVEE-VPVEQPPEEYLDPDACFTEGCVQRFKCCQVNIIEGLG | 1181 |
| <a href="#">NP_001180031.1</a> | 1133 | EGSTIDIKPEVEE-VPVEQPPEEYLDPDACFTEGCVQRFKCCQVNIIEGLG | 1181 |
| <a href="#">NP_001070967.1</a> | 1131 | EGSTIDIKPEVEE-VPVEQPPEEYLDPDACFTEGCVQRFKCCQVNIIEGLG | 1179 |
| <a href="#">NP_062139.2</a>    | 1131 | EGSTIDIKPEVEE-VPVEQPPEEYLDPDACFTEGCVQRFKCCQVNIIEGLG | 1179 |
| <a href="#">XP_003643160.1</a> | 1131 | EGSTIDIKPEVEE-VPVEAPEEYLDPDACFTEGCMQRKCCQVNIIEGLG   | 1179 |
| <a href="#">NP_001038648.1</a> | 1107 | EGSTIDIKPDEEEMAVVEVVEEYLDPEACWTDACVARYKCCDVPITEGWG  | 1156 |
| <a href="#">NP_571703.1</a>    | 1101 | EGSTIDIKPEVEEAVVETVEEYVDPEACWTEACIARYKCCDVPITEGWG   | 1150 |
| <a href="#">XP_004911965.1</a> | 753  | EGSTIDIKPEAEE-VPVEQPPEEYLDPDNCFTEGCVARFKCCQVSVIEGLG | 801  |

|                                |      |                                                     |      |
|--------------------------------|------|-----------------------------------------------------|------|
| <a href="#">NP_055006.1</a>    | 1182 | KSWWILRKTCFLIVEHNWFETFIIFMILLSSGALAFEDIYIEQRKTIRTI  | 1231 |
| <a href="#">XP_001141985.3</a> | 1182 | KSWWILRKTCFLIVEHNWFETFIIFMILLSSGALAFEDIYIEQRKTIRTI  | 1231 |
| <a href="#">XP_001090295.1</a> | 1182 | KSWWILRKTCFLIVEHNWFETFIIFMILLSSGALAFEDIYIEQRKTIRTI  | 1231 |
| <a href="#">XP_850134.1</a>    | 1182 | KSWWILRKTCFLIVEHNWFETFIIFMILLSSGALAFEDIYIEQRKTIRTI  | 1231 |
| <a href="#">NP_001180031.1</a> | 1182 | KSWWILRKTCFLIVEHNWFETFIIFMILLSSGALAFEDIYIEQRKTIRTI  | 1231 |
| <a href="#">NP_001070967.1</a> | 1180 | KSWWILRKTCFLIVEHNWFETFIIFMILLSSGALAFEDIYIEQRKTIRTI  | 1229 |
| <a href="#">NP_062139.2</a>    | 1180 | KSWWILRKTCFLIVEHNWFETFIIFMILLSSGALAFEDIYIEQRKTIRTI  | 1229 |
| <a href="#">XP_003643160.1</a> | 1180 | KSWWTLRKTCFLIVEHNWFETFIIFMILLSSGALAFEDIYIEQRKTIRTI  | 1229 |
| <a href="#">NP_001038648.1</a> | 1157 | KYWWFLRKTCYFLIVEHNWFETLIIFMILLSSGALAFEDVYIEQRKTIQII | 1206 |
| <a href="#">NP_571703.1</a>    | 1151 | KNWWFLRKTCYFLIVEHNWFETLIIFMILLSSGALAFEDVYIEQRKTIRII | 1200 |
| <a href="#">XP_004911965.1</a> | 802  | KSWWTLRKTCFLIVEHNWFETFIIFMILLSSGALAFEDVYIEQRKTIRTI  | 851  |

|                                |      |                                                     |      |
|--------------------------------|------|-----------------------------------------------------|------|
| <a href="#">NP_055006.1</a>    | 1232 | LEYADKVFTYIFILEMLLKWTAYGFVKFFFTNAWCWLDFLIVAVSLVSLIA | 1281 |
| <a href="#">XP_001141985.3</a> | 1232 | LEYADKVFTYIFILEMLLKWTAYGFVKFFFTNAWCWLDFLIVAVSLVSLIA | 1281 |
| <a href="#">XP_001090295.1</a> | 1232 | LEYADKVFTYIFILEMLLKWTAYGFVKFFFTNAWCWLDFLIVAVSLVSLIA | 1281 |
| <a href="#">XP_850134.1</a>    | 1232 | LEYADKVFTYIFILEMLLKWTAYGFVKFFFTNAWCWLDFLIVAVSLVSLIA | 1281 |
| <a href="#">NP_001180031.1</a> | 1232 | LEYADKVFTYIFILEMLLKWTAYGFVKFFFTNAWCWLDFLIVAVSLVSLIA | 1281 |
| <a href="#">NP_001070967.1</a> | 1230 | LEYADKVFTYIFILEMLLKWTAYGFVKFFFTNAWCWLDFLIVAVSLVSLIA | 1279 |
| <a href="#">NP_062139.2</a>    | 1230 | LEYADKVFTYIFILEMLLKWTAYGFVKFFFTNAWCWLDFLIVAVSLVSLIA | 1279 |
| <a href="#">XP_003643160.1</a> | 1230 | LEYADKVFTYIFILEMLLKWCAYGFVKFFFTNAWCWLDFLIVAVSLVSLIA | 1279 |
| <a href="#">NP_001038648.1</a> | 1207 | LEYADRVFTYIFILEMLLKWVAYGFVKYFTNAWCWLDFFIVDVSIVSLIA  | 1256 |
| <a href="#">NP_571703.1</a>    | 1201 | LEYADMVFTYIFILEMLLKWVAYGFVKYFTNAWCWLDFFIVDVSIVSLIA  | 1250 |
| <a href="#">XP_004911965.1</a> | 852  | LEYADKVFTYIFILEMLLKWLAYGFVKFFFTNAWCWLDFLIVDVSIVSLIA | 901  |

|                                |      |                                                    |      |
|--------------------------------|------|----------------------------------------------------|------|
| <a href="#">NP_055006.1</a>    | 1282 | NALGYSELGAIKSLRTLRLRPLRLALSRFEGMRVVVNALVGAIPSIMNVL | 1331 |
| <a href="#">XP_001141985.3</a> | 1282 | NALGYSELGAIKSLRTLRLRPLRLALSRFEGMRVVVNALVGAIPSIMNVL | 1331 |
| <a href="#">XP_001090295.1</a> | 1282 | NALGYSELGAIKSLRTLRLRPLRLALSRFEGMRVVVNALVGAIPSIMNVL | 1331 |
| <a href="#">XP_850134.1</a>    | 1282 | NALGYSELGAIKSLRTLRLRPLRLALSRFEGMRVVVNALVGAIPSIMNVL | 1331 |
| <a href="#">NP_001180031.1</a> | 1282 | NALGYSELGAIKSLRTLRLRPLRLALSRFEGMRVVVNALVGAIPSIMNVL | 1331 |
| <a href="#">NP_001070967.1</a> | 1280 | NALGYSELGAIKSLRTLRLRPLRLALSRFEGMRVVVNALVGAIPSIMNVL | 1329 |
| <a href="#">NP_062139.2</a>    | 1280 | NALGYSELGAIKSLRTLRLRPLRLALSRFEGMRVVVNALVGAIPSIMNVL | 1329 |
| <a href="#">XP_003643160.1</a> | 1280 | NALGYSELGAIKSLRTLRLRPLRLALSRFEGMRVVVNALVGAIPSIMNVL | 1329 |
| <a href="#">NP_001038648.1</a> | 1257 | NALGYSDLGPIKSLRTLRLRPLRLALSRFEGMRVVVNALVGAIPSIMNVP | 1306 |
| <a href="#">NP_571703.1</a>    | 1251 | NALGYSDLGPIKSLRTLRLRPLRLALSRFEGMRVVVNALVGAIPSIMNVL | 1300 |
| <a href="#">XP_004911965.1</a> | 902  | NALGYSELGAIKSLRTLRLRPLRLALSRFEGMRVVVNALVGAIPSIMNVL | 951  |

|                                |      |                                                     |      |
|--------------------------------|------|-----------------------------------------------------|------|
| <a href="#">NP_055006.1</a>    | 1332 | LVCLIFWLIFSIMGVNLFAGKYHYCFNETSEIRFEIEDVNNKTECEKLME  | 1381 |
| <a href="#">XP_001141985.3</a> | 1332 | LVCLIFWLIFSIMGVNLFAGKYHYCFNETSEIRFEIEDVNNKTECEKLME  | 1381 |
| <a href="#">XP_001090295.1</a> | 1332 | LVCLIFWLIFSIMGVNLFAGKYHYCFNETSEIRFEIEDVNNKTECEKLME  | 1381 |
| <a href="#">XP_850134.1</a>    | 1332 | LVCLIFWLIFSIMGVNLFAGKYHYCFNETSEIRFDIEDVNNKTECEKLME  | 1381 |
| <a href="#">NP_001180031.1</a> | 1332 | LVCLIFWLIFSIMGVNLFAGKYHYCFNETSEIRFEIEDVNNKTECEKLME  | 1381 |
| <a href="#">NP_001070967.1</a> | 1330 | LVCLIFWLIFSIMGVNLFAGKYHYCFNETSEIRFEIEDVNNKTDCEKLME  | 1379 |
| <a href="#">NP_062139.2</a>    | 1330 | LVCLIFWLIFSIMGVNLFAGKYHYCFNETSEIRFEIDVNNKTDCEKLME   | 1379 |
| <a href="#">XP_003643160.1</a> | 1330 | LVCLIFWLIFSIMGVNLFAGKYHYCFNETSEERFEIEIVNNKTDCEALMP  | 1379 |
| <a href="#">NP_001038648.1</a> | 1307 | LVCLIFWLIFSIMGVNLFAGKYHYCFNETSEIRFEIEIVNNKTECFALIN  | 1356 |
| <a href="#">NP_571703.1</a>    | 1301 | LVCLIFWLIFSIMGVNMFGAGKYHYCFNETSEIRFEIEIVNNKTECFALIE | 1350 |
| <a href="#">XP_004911965.1</a> | 952  | LVCLIFWLIFSIMGVNLFAGKYHYCFNETSEIRFEIEIVNNKTECFALIE  | 1001 |

|                                |      |                                                    |      |
|--------------------------------|------|----------------------------------------------------|------|
| <a href="#">NP_055006.1</a>    | 1382 | GNNTEIRWKNVKINFDNVGAGYLALLQVATFKGWMDIMYAAVDSRKPDQ  | 1431 |
| <a href="#">XP_001141985.3</a> | 1382 | GNNTEIRWKNVKINFDNVGAGYLALLQVATFKGWMDIMYAAVDSRKPDQ  | 1431 |
| <a href="#">XP_001090295.1</a> | 1382 | GNNTEIRWKNVKINFDNVGAGYLALLQVATFKGWMDIMYAAVDSRKPDQ  | 1431 |
| <a href="#">XP_850134.1</a>    | 1382 | GNNTEIRWKNVKINFDNVGAGYLALLQVATFKGWMDIMYAAVDSRKPDQ  | 1431 |
| <a href="#">NP_001180031.1</a> | 1382 | GNNTEIRWKNVKINFDNVGAGYLALLQVATFKGWMDIMYAAVDSRKPDQ  | 1431 |
| <a href="#">NP_001070967.1</a> | 1380 | GNNTEIRWKNVKINFDNVGAGYLALLQVATFKGWMDIMYAAVDSRKPDQ  | 1429 |
| <a href="#">NP_062139.2</a>    | 1380 | GNSTEIRWKNVKINFDNVGAGYLALLQVATFKGWMDIMYAAVDSRKPDQ  | 1429 |
| <a href="#">XP_003643160.1</a> | 1380 | PNSTEIRWKNVKINFDNVGAGYLALLQVATFKGWMDIMYAAVDSRKQEEQ | 1429 |
| <a href="#">NP_001038648.1</a> | 1357 | ANYTEVRWKNVKINFDNVGAGYLALLQVATFKGWMDIMYAAVDSRKVEDQ | 1406 |
| <a href="#">NP_571703.1</a>    | 1351 | QNYTEVRWKNVKINFDNVGAGYLALLQVATFKGWMDIMYAAVDSRRVEDQ | 1400 |
| <a href="#">XP_004911965.1</a> | 1002 | NNYTEVRWKNVKINFDNVGAGYLALLQVATFKGWMDIMYAAVDSRKVHQQ | 1051 |

|                                |      |                                                   |      |
|--------------------------------|------|---------------------------------------------------|------|
| <a href="#">NP_055006.1</a>    | 1432 | PKYEDNIYMYIYFVIFIIFGSFFTLNLFIGVIIDNFNQKKKFGGQDIFM | 1481 |
| <a href="#">XP_001141985.3</a> | 1432 | PKYEDNIYMYIYFVIFIIFGSFFTLNLFIGVIIDNFNQKKKFGGQDIFM | 1481 |
| <a href="#">XP_001090295.1</a> | 1432 | PKYEDNIYMYIYFVIFIIFGSFFTLNLFIGVIIDNFNQKKKFGGQDIFM | 1481 |
| <a href="#">XP_850134.1</a>    | 1432 | PKYEDNIYMYIYFVIFIIFGSFFTLNLFIGVIIDNFNQKKKFGGQDIFM | 1481 |
| <a href="#">NP_001180031.1</a> | 1432 | PKYEDNIYMYIYFVIFIIFGSFFTLNLFIGVIIDNFNQKKKFGGQDIFM | 1481 |
| <a href="#">NP_001070967.1</a> | 1430 | PDYEGNIYMYIYFVIFIIFGSFFTLNLFIGVIIDNFNQKKKFGGQDIFM | 1479 |
| <a href="#">NP_062139.2</a>    | 1430 | PDYEGNIYMYIYFVIFIIFGSFFTLNLFIGVIIDNFNQKKKFGGQDIFM | 1479 |
| <a href="#">XP_003643160.1</a> | 1430 | PKYEDNIYMYIYFVIFIIFGSFFTLNLFIGVIIDNFNQKKKFGGQDIFM | 1479 |
| <a href="#">NP_001038648.1</a> | 1407 | PLYEDNIYMYIYFVIFIIFGSFFTLNLFIGVIIDNFNQKKKFGGQDIFM | 1456 |
| <a href="#">NP_571703.1</a>    | 1401 | PKYEDNIYMYIYFVIFIIFGSFFTLNLFIGVIIDNFNQKKKFGGQDIFM | 1450 |
| <a href="#">XP_004911965.1</a> | 1052 | PKYEDNIYMYIYFVIFIIFGSFFTLNLFIGVIIDNFNQKKKFGGQDIFM | 1101 |

|                                |      |                                                       |      |
|--------------------------------|------|-------------------------------------------------------|------|
| <a href="#">NP_055006.1</a>    | 1482 | TEEQKKYYNAMKKLGSKKPQKPIPRPLNKIQGIVDFVTTQQAQFDIVIMML   | 1531 |
| <a href="#">XP_001141985.3</a> | 1482 | TEEQKKYYNAMKKLGSKKPQKPIPRPL-----                      | 1508 |
| <a href="#">XP_001090295.1</a> | 1482 | TEEQKKYYNAMKKLGSKKPQKPIPRPLNKIQGIVDFVTTQQAQFDIVIMML   | 1531 |
| <a href="#">XP_850134.1</a>    | 1482 | TEEQKKYYNAMKKLGSKKPQKPIPRPLNKIQGIIIFDFVTTQQAQFDIVIMML | 1531 |
| <a href="#">NP_001180031.1</a> | 1482 | TEEQKKYYNAMKKLGSKKPQKPIPRPLNKIQGIVDFVTTQQAQFDIVIMML   | 1531 |
| <a href="#">NP_001070967.1</a> | 1480 | TEEQKKYYNAMKKLGSKKPQKPIPRPLNKIQGIVDFVTTQQAQFDIVIMML   | 1529 |
| <a href="#">NP_062139.2</a>    | 1480 | TEEQKKYYNAMKKLGSKKPQKPIPRPLNKIQGIVDFVTTQQAQFDIVIMML   | 1529 |
| <a href="#">XP_003643160.1</a> | 1480 | TEEQKKYYNAMKKLGSKKPQKPIPRPLNRIQGAIVDFVTTQQAQFDIVIMML  | 1529 |
| <a href="#">NP_001038648.1</a> | 1457 | PEEQKKYYNAMKKLGSKKPQKPIPRPLNKIQGMVDFVTTQQAQFDISIMML   | 1506 |
| <a href="#">NP_571703.1</a>    | 1451 | TEEQKKYYNAMKKLGSKKPQKPIPRPQNKLQGMVDFVTTQQAQFDISIMIL   | 1500 |
| <a href="#">XP_004911965.1</a> | 1102 | TEEQKKYYNAMKKLGSKKPQKPIPRPLNKFQGAIFDIITQQAQFDIVIMIL   | 1151 |

|                                |      |                                                     |      |
|--------------------------------|------|-----------------------------------------------------|------|
| <a href="#">NP_055006.1</a>    | 1532 | ICLNMVTMMVETDTQSKQMENILYWINLVFVIFFTCECVLKMFAIRHYFF  | 1581 |
| <a href="#">XP_001141985.3</a> | 1509 | -CL-----DGKRREVSPI SITXLLFLFL-----                  | 1532 |
| <a href="#">XP_001090295.1</a> | 1532 | ICLNMVTMMVETDTQSKQMENILYWINLVFVIFFTCECVLKMFAIRHYFF  | 1581 |
| <a href="#">XP_850134.1</a>    | 1532 | ICLNMVTMMVETDTQSKQMENILYWINLVFVIFFTCECVLKMFAIRHYFF  | 1581 |
| <a href="#">NP_001180031.1</a> | 1532 | ICLNMVTMMVETDTQSKQMENILYWINLVFVIFFTCECVLKMFAIRHYFF  | 1581 |
| <a href="#">NP_001070967.1</a> | 1530 | ICLNMVTMMVETDTQSKQMENILYWINLVFVIFFTCECVLKMFAIRHYFF  | 1579 |
| <a href="#">NP_062139.2</a>    | 1530 | ICLNMVTMMVETDTQSKQMENILYWINLVFVIFFTCECVLKMFAIRHYFF  | 1579 |
| <a href="#">XP_003643160.1</a> | 1530 | ICLNMVTMMVETDTQSKQMEDILYWINLVFVIFFTCECVLKMFAIRHYFF  | 1579 |
| <a href="#">NP_001038648.1</a> | 1507 | ICLNMVTMMVETDDQSDQETENILYWINFVIVAFVTGEFVLKLFALRHYFF | 1556 |
| <a href="#">NP_571703.1</a>    | 1501 | ICLNMVTMMVETDDQSQETENILYWINFIVAFVTSEFVLKLFALRHYFF   | 1550 |
| <a href="#">XP_004911965.1</a> | 1152 | ICLNMVTMMVETDDQSDYTDNVLYWINVVFVFTTECEVLKLCALRHYFF   | 1201 |



|                                |      |                                                     |      |
|--------------------------------|------|-----------------------------------------------------|------|
| <a href="#">NP_055006.1</a>    | 1582 | TIGWNIFDFVTVVILSVGMFLADIIIEKYFVSPTLFRVIRLARIGRILRLI | 1631 |
| <a href="#">XP_001141985.3</a> | 1533 | -----GMFLADIIIEKYFVSPTLFRVIRLARIGRILRLI             | 1565 |
| <a href="#">XP_001090295.1</a> | 1582 | TIGWNIFDFVTVVILSVGMFLADIIIEKYFVSPTLFRVIRLARIGRILRLI | 1631 |
| <a href="#">XP_850134.1</a>    | 1582 | TIGWNIFDFVTVVILSVGMFLADIIIEKYFVSPTLFRVIRLARIGRILRLI | 1631 |
| <a href="#">NP_001180031.1</a> | 1582 | TIGWNIFDFVTVVILSVGMFLADIIIEKYFVSPTLFRVIRLARIGRILRLI | 1631 |
| <a href="#">NP_001070967.1</a> | 1580 | TIGWNIFDFVTVVILSVGMFLADIIIEKYFVSPTLFRVIRLARIGRILRLI | 1629 |
| <a href="#">NP_062139.2</a>    | 1580 | TIGWNIFDFVTVVILSVGMFLADIIIEKYFVSPTLFRVIRLARIGRILRLI | 1629 |
| <a href="#">XP_003643160.1</a> | 1580 | TIGWNIFDFVTVVILSVGMFLADIIIEKYFVSPTLFRVIRLARIGRILRLI | 1629 |
| <a href="#">NP_001038648.1</a> | 1557 | TNGWNVDFCVTVVILSVGMFLADIIIEKYFVSPTLFRVIRLARIGRILRLI | 1606 |
| <a href="#">NP_571703.1</a>    | 1551 | TNGWNVDFCVTVVILSVGMFLADIIIEKYFVSPTLFRVIRLARIGRILRLI | 1600 |
| <a href="#">XP_004911965.1</a> | 1202 | TIGWNIFDFVTVVILSVGMFLADIIIEKYFVSPTLFRVIRLARIGRILRLI | 1251 |

|                                |      |                                                   |      |
|--------------------------------|------|---------------------------------------------------|------|
| <a href="#">NP_055006.1</a>    | 1632 | KGAKGIRTLFLALMMSLPALFNIGLLFLVMFIFSIFGMSNFAYVKHEAG | 1681 |
| <a href="#">XP_001141985.3</a> | 1566 | KGAKGIRTLFLALMMSLPALFNIGLLFLVMFIFSIFGMSNFAYVKHEAG | 1615 |
| <a href="#">XP_001090295.1</a> | 1632 | KGAKGIRTLFLALMMSLPALFNIGLLFLVMFIFSIFGMSNFAYVKHEAG | 1681 |
| <a href="#">XP_850134.1</a>    | 1632 | KGAKGIRTLFLALMMSLPALFNIGLLFLVMFIFSIFGMSNFAYVKHEAG | 1681 |
| <a href="#">NP_001180031.1</a> | 1632 | KGAKGIRTLFLALMMSLPALFNIGLLFLVMFIFSIFGMSNFAYVKHEAG | 1681 |
| <a href="#">NP_001070967.1</a> | 1630 | KGAKGIRTLFLALMMSLPALFNIGLLFLVMFIFSIFGMSNFAYVKHEAG | 1679 |
| <a href="#">NP_062139.2</a>    | 1630 | KGAKGIRTLFLALMMSLPALFNIGLLFLVMFIFSIFGMSNFAYVKHEAG | 1679 |
| <a href="#">XP_003643160.1</a> | 1630 | KGAKGIRTLFLALMMSLPALFNIGLLFLVMFIFSIFGMSNFAYVKHEAG | 1679 |
| <a href="#">NP_001038648.1</a> | 1607 | KGAKGIRTLFLALMMSLPALFNIGLLFLVMFIFSIFGMSNFAYVKREIG | 1656 |
| <a href="#">NP_571703.1</a>    | 1601 | KGAKGIRTLFLALMMSLPALFNIGLLFLVMFIFSIFGMSNFAYVKRESG | 1650 |
| <a href="#">XP_004911965.1</a> | 1252 | KGAKGIRTLFLALMMSLPALFNIGLLFLVMFIFSIFGMSNFAYVKHEAG | 1301 |

|                                |      |                                                    |      |
|--------------------------------|------|----------------------------------------------------|------|
| <a href="#">NP_055006.1</a>    | 1682 | IDDMFNFTFGNSMICLFQITTSAGWDGLLLPILNRPPDCSLDKHEHPGSG | 1731 |
| <a href="#">XP_001141985.3</a> | 1616 | IDDMFNFTFGNSMICLFQITTSAGWDGLLLPILNRPPDCSLDKHEHPGSG | 1665 |
| <a href="#">XP_001090295.1</a> | 1682 | IDDMFNFTFGNSMICLFQITTSAGWDGLLLPILNRPPDCSLDKHEHPGSG | 1731 |
| <a href="#">XP_850134.1</a>    | 1682 | IDDMFNFTFGNSMICLFQITTSAGWDGLLLPILNRPPDCSLDKHEHPGSG | 1731 |
| <a href="#">NP_001180031.1</a> | 1682 | IDDMFNFTFGNSMICLFQITTSAGWDGLLLPILNRPPDCSLDKHEHPGSG | 1731 |
| <a href="#">NP_001070967.1</a> | 1680 | IDDMFNFTFGNSMICLFQITTSAGWDGLLLPILNRPPDCSLDKHEHPGSG | 1729 |
| <a href="#">NP_062139.2</a>    | 1680 | IDDMFNFTFGNSMICLFQITTSAGWDGLLLPILNRPPDCSLDKHEHPGSG | 1729 |
| <a href="#">XP_003643160.1</a> | 1680 | IDDMFNFTFGNSMICLFQITTSAGWDGLLLPILNRPPDCSLDKHEHPGSG | 1729 |
| <a href="#">NP_001038648.1</a> | 1657 | IDDMYNFTFGNSMICLFMITTSAGWDGLLLPILNYPDCDPNKENPGTT   | 1706 |
| <a href="#">NP_571703.1</a>    | 1651 | IDDMYNFTFGNSMICLFMITTSAGWDGLLLPILNYPDCDPTKENPGTS   | 1700 |
| <a href="#">XP_004911965.1</a> | 1302 | IDDMFNFTFGNSMICLFQITTSAGWDGLLLPILNRPPDCDAHKENPGSQ  | 1351 |

|                                |      |                                                    |      |
|--------------------------------|------|----------------------------------------------------|------|
| <a href="#">NP_055006.1</a>    | 1732 | FKGDCGNPSVGIFFFVSYIIISFLIVVNMYIAIILENFSVATEESADPLS | 1781 |
| <a href="#">XP_001141985.3</a> | 1666 | FKGDCGNPSVGIFFFVSYIIISFLIVVNMYIAIILENFSVATEESADPLS | 1715 |
| <a href="#">XP_001090295.1</a> | 1732 | FKGDCGNPSVGIFFFVSYIIISFLIVVNMYIAIILENFSVATEESADPLS | 1781 |
| <a href="#">XP_850134.1</a>    | 1732 | FKGDCGNPSVGIFFFVSYIIISFLIVVNMYIAIILENFSVATEESADPLS | 1781 |
| <a href="#">NP_001180031.1</a> | 1732 | FKGDCGNPSVGIFFFVSYIIISFLIVVNMYIAIILENFSVATEESADPLS | 1781 |
| <a href="#">NP_001070967.1</a> | 1730 | FKGDCGNPSVGIFFFVSYIIISFLIVVNMYIAIILENFSVATEESADPLS | 1779 |
| <a href="#">NP_062139.2</a>    | 1730 | FKGDCGNPSVGIFFFVSYIIISFLIVVNMYIAIILENFSVATEESADPLS | 1779 |
| <a href="#">XP_003643160.1</a> | 1730 | FKGDCGNPSVGIFFFVSYIIISFLIVVNMYIAIILENFSVATEESADPLS | 1779 |
| <a href="#">NP_001038648.1</a> | 1707 | VKGNCGNPSVGIFFFVSYIIISFLIVVNMYIAIILENFSVATEESADPLC | 1756 |
| <a href="#">NP_571703.1</a>    | 1701 | VKGNCGNPSVGIFFFVSYIIISFLIVVNMYIAIILENFSVATEESADPLC | 1750 |
| <a href="#">XP_004911965.1</a> | 1352 | VKGDCGNPSVGIFFFVSYIIISFLIVVNMYIAIILENFSVATEESADPLS | 1401 |

|                                |      |                                                     |      |
|--------------------------------|------|-----------------------------------------------------|------|
| <a href="#">NP_055006.1</a>    | 1782 | EDDFETFYIEWEKFDPDATQFIEYCKLADFADALEHPLRVKPKNTIELIA  | 1831 |
| <a href="#">XP_001141985.3</a> | 1716 | EDDFETFYIEWEKFDPDATQFIEYCKLADFADALEHPLRVKPKNTIELIA  | 1765 |
| <a href="#">XP_001090295.1</a> | 1782 | EDDFETFYIEWEKFDPDATQFIEYCKLADFADALEHPLRVKPKNTIELIA  | 1831 |
| <a href="#">XP_850134.1</a>    | 1782 | EDDFETFYIEWEKFDPDATQFIEYCKLADFADALEHPLRVKPKNTIELIA  | 1831 |
| <a href="#">NP_001180031.1</a> | 1782 | EDDFETFYIEWEKFDPDATQFIEYCKLADFADALEHPLRVKPKNTIELIA  | 1831 |
| <a href="#">NP_001070967.1</a> | 1780 | EDDFETFYIEWEKFDPDATQFIEYCKLADFADALEHPLRVKPKNTIELIA  | 1829 |
| <a href="#">NP_062139.2</a>    | 1780 | EDDFETFYIEWEKFDPDATQFIEYCKLADFADALEHPLRVKPKNTIELIA  | 1829 |
| <a href="#">XP_003643160.1</a> | 1780 | EDDFETFYIEWEKFDPDATQFIEYCKLADFADALEHPLRVKPKNTIELIA  | 1829 |
| <a href="#">NP_001038648.1</a> | 1757 | EDDFESFYIEWEKFDPDASQFITPAKLPDFADTLEHPLRVKPKNTIELIA  | 1806 |
| <a href="#">NP_571703.1</a>    | 1751 | EDDFESFYIEWEKFDPDASQFITPAKLPDFADTLEHPLRVKPKNTIELIA  | 1800 |
| <a href="#">XP_004911965.1</a> | 1402 | EDDFETFYIEWEKFDPDATQFIQFSKLPDFADALEHPLRIPKPKNTIELIA | 1451 |

|                                |      |                                                     |      |
|--------------------------------|------|-----------------------------------------------------|------|
| <a href="#">NP_055006.1</a>    | 1832 | MDLPMVSGDRIHCLDILFAFTKRVLGDSGELDILRQQMEERFVASNP SKV | 1881 |
| <a href="#">XP_001141985.3</a> | 1766 | MDLPMVSGDRIHCLDILFAFTKRVLGDSGELDILRQQMEERFVASNP SKV | 1815 |
| <a href="#">XP_001090295.1</a> | 1832 | MDLPMVSGDRIHCLDILFAFTKRVLGDSGELDILRQQMEERFVASNP SKV | 1881 |
| <a href="#">XP_850134.1</a>    | 1832 | MDLPMVSGDRIHCLDILFAFTKRVLGDSGELDILRQQMEERFVASNP SKV | 1881 |
| <a href="#">NP_001180031.1</a> | 1832 | MDLPMVSGDRIHCLDILFAFTKRVLGDSGELDILRQQMEERFVASNP SKV | 1881 |
| <a href="#">NP_001070967.1</a> | 1830 | MDLPMVSGDRIHCLDILFAFTKRVLGDSGELDILRQQMEERFVASNP SKV | 1879 |
| <a href="#">NP_062139.2</a>    | 1830 | MDLPMVSGDRIHCLDILFAFTKRVLGDSGELDILRQQMEERFVASNP SKV | 1879 |
| <a href="#">XP_003643160.1</a> | 1830 | MDLPMVSGDRIHCLDILFAFTKRVLGDSGELDILRQQMEERFVASNP SKV | 1879 |
| <a href="#">NP_001038648.1</a> | 1807 | MDLPMVSGDRIHCLDILFAFTKRVLGDSGDLMMRQQMEERFVAANP SKV  | 1856 |
| <a href="#">NP_571703.1</a>    | 1801 | MDLPMVSGDRIHCLDILFAFTKRVLGDSGDLMMRQQMEERFVAANP SKV  | 1850 |
| <a href="#">XP_004911965.1</a> | 1452 | MDLPMVSGDRIHCLDILFAFTKRVLGESGELDILRQQMEERFVASNP SKV | 1501 |

|                                |      |                                                      |      |
|--------------------------------|------|------------------------------------------------------|------|
| <a href="#">NP_055006.1</a>    | 1882 | SYEPITTTLLRRKQEEVS AVVLQRAYRGHLARRGFICKK-TTSNKLENGGT | 1930 |
| <a href="#">XP_001141985.3</a> | 1816 | SYEPITTTLLRRKQEEVS AVVLQRAYRGHLARRGFICKK-TTSNKLENGGT | 1864 |
| <a href="#">XP_001090295.1</a> | 1882 | SYEPITTTLLRRKQEEVS AVVLQRAYRGHLARRGFICKK-TTSNKLENGGT | 1930 |
| <a href="#">XP_850134.1</a>    | 1882 | SYEPITTTLLRRKQEEVS AVVLQRAYRGHLARRGFICKK-TTSNKLENGGT | 1930 |
| <a href="#">NP_001180031.1</a> | 1882 | SYEPITTTLLRRKQEEVS AVVLQRAYRGHLARRGFICKK-TTSNKLENGGT | 1930 |
| <a href="#">NP_001070967.1</a> | 1880 | SYEPITTTLLRRKQEEVS AVVLQRAYRGHLARRGFICRK-ITSNKLENGGT | 1928 |
| <a href="#">NP_062139.2</a>    | 1880 | SYEPITTTLLRRKQEEVS AVVLQRAYRGHLARRGFICRK-MASNKLENGGT | 1928 |
| <a href="#">XP_003643160.1</a> | 1880 | SYEPITTTLLRRKQEEVS AVVLQRAYRSLARRGFISRR-PLPTKMENGGT  | 1928 |
| <a href="#">NP_001038648.1</a> | 1857 | SYEPITTTLLRRKQEEVSAIVIQRSYRSHLASRGFICKRRPANNKLENGGG  | 1906 |
| <a href="#">NP_571703.1</a>    | 1851 | SFEPITTTLLRRKQEHMSAGVIQRAFRAHLIRKGFICKRLLSSSRLENGGT  | 1900 |
| <a href="#">XP_004911965.1</a> | 1502 | SYEPITTTLLRRKQEDVSAVVIQYAYRHLVKRGFISRK-RSTGKMENGGT   | 1550 |

|                                |      |                                                      |      |
|--------------------------------|------|------------------------------------------------------|------|
| <a href="#">NP_055006.1</a>    | 1931 | HREKKESTPSTASLPSYDSVTKEPEKEKQQ--RAEEGRERAKRQKEVRES   | 1978 |
| <a href="#">XP_001141985.3</a> | 1865 | HREKKESTPSTASLPSYDSVTKEPEKEKQQ--RAEEGRERAKRQKEVRES   | 1912 |
| <a href="#">XP_001090295.1</a> | 1931 | HREKKESTPSTASLPSYDSVTKEPEKEKQQ--RAEEGRERTKRQKEVRES   | 1978 |
| <a href="#">XP_850134.1</a>    | 1931 | HREKKESTPSTASLPSYDSVTKEPEKEKQQ--RAEEGRERAKRQKEVRES   | 1978 |
| <a href="#">NP_001180031.1</a> | 1931 | HREKKESTPSTASLPSYDSVTKEPEKEKQQ--RAEEGRERAKRQKEVRES   | 1978 |
| <a href="#">NP_001070967.1</a> | 1929 | HREKKESTPSTASLPSYDSVTKEPEKEKQQ--RAEEGRERAKRQKEVRES   | 1976 |
| <a href="#">NP_062139.2</a>    | 1929 | HRDKKESTPSTASLPSYDSVTKEPEKEKQQ--RAEEGRERAKRQKEVRES   | 1976 |
| <a href="#">XP_003643160.1</a> | 1929 | NREKKEGTPSTASLPSYDSVTKEPEKEKQQ--RAEEGRERAKRQKDVRES   | 1976 |
| <a href="#">NP_001038648.1</a> | 1907 | NQEKKEGTPSTASLPSYDSVTKEPEKEKQDDNNEGKGRKEKGRNQKDVRES  | 1956 |
| <a href="#">NP_571703.1</a>    | 1901 | NQDKKEGTPSTASLPSYDSVTKEPEKEKLEE-SDSKGK--KGKNQKDVRES  | 1947 |
| <a href="#">XP_004911965.1</a> | 1551 | NMDKKEGTPSTASLPSYDSVTKEPEKEKQEE--RIEDAIRERAKKQKSVRES | 1598 |

|                                |      |    |      |
|--------------------------------|------|----|------|
| <a href="#">NP_055006.1</a>    | 1979 | KC | 1980 |
| <a href="#">XP_001141985.3</a> | 1913 | KC | 1914 |
| <a href="#">XP_001090295.1</a> | 1979 | KC | 1980 |
| <a href="#">XP_850134.1</a>    | 1979 | KC | 1980 |
| <a href="#">NP_001180031.1</a> | 1979 | KC | 1980 |
| <a href="#">NP_001070967.1</a> | 1977 | KC | 1978 |
| <a href="#">NP_062139.2</a>    | 1977 | KC | 1978 |
| <a href="#">XP_003643160.1</a> | 1977 | KC | 1978 |
| <a href="#">NP_001038648.1</a> | 1957 | KC | 1958 |
| <a href="#">NP_571703.1</a>    | 1948 | KF | 1949 |
| <a href="#">XP_004911965.1</a> | 1599 | KC | 1600 |
